# Supplementary material for: The rapid and controllable fabrication of large-scale and highly ordered micro-honeycomb arrays induced by nonsolvent phase separation
Source: Royal Society of Chemistry journal article supplement (doi:10.1039/d1sm00619c), 2021-01-01
Supplement: d1sm00619c1.pdf [file d1sm00619c1.pdf]

# Rapidly and Controllable Fabrication of Large-Scale and High-orderly Micro-Honeycomb Arrays Induced by Nonsolvent Phase Separation

*Xiaoyu Zhang,<sup>a, b</sup> Shuya Wang,<sup>a, b</sup> Shengpeng Han,<sup>a, b</sup> Xiao Ouyang,<sup>a, b</sup> Ning Ma,<sup>a, b</sup> Hao Wei<sup>a, b</sup> & Xinyue Zhang<sup>\*, a, b</sup>*

<sup>a</sup>College of Materials Science and Chemical Engineering, Harbin Engineering University, Harbin, 150001, China

<sup>b</sup>Qingdao Innovation and Development Base, Harbin Engineering University, Qingdao, 266400, China

## Table of content

1. Data of DPD stimulation (**Figure S1, Table S1-S3**).
2. The equipment and surface temperature for forming the micro-structures (**Figure S2-S4**).
3. Morphology by changing the preparing conditions (**Figure S5, Figure S6-S9**).
4. Video for the formation of micro-honeycomb structures (**Movie S1**).

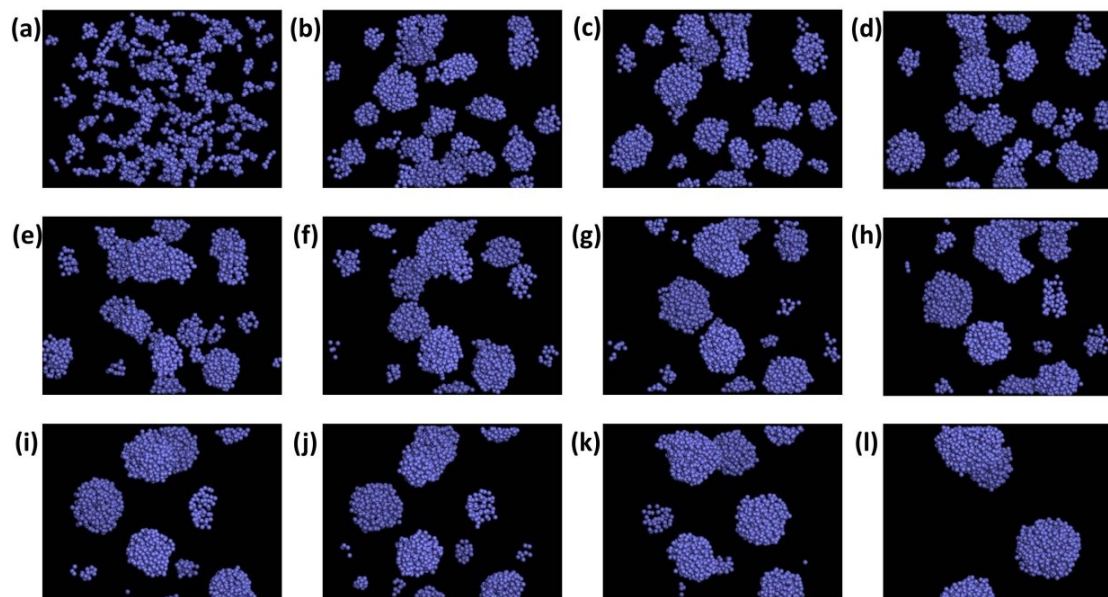

**Figure S1.** The DPD stimulation. (a-l) The phase separation of chloroform, methanol and PMMA ternary system simulated by dissipative particle dynamics along with time by erasing the chloroform and PMMA beads

**Table S1.** Parameters of each bead used in this simulation<sup>1</sup>.

| Bead                    | $\rho / \text{g}\cdot\text{cm}^{-3}$ | Unit molar<br>volume /<br>$\text{cm}^3\cdot\text{mol}^{-1}$ | Unit<br>volume / $\text{\AA}^3$ | Number of repeat<br>units or molecules<br>for per bead | Solubility<br>parameter /<br>$\text{MPa}^{0.5}$ |
|-------------------------|--------------------------------------|-------------------------------------------------------------|---------------------------------|--------------------------------------------------------|-------------------------------------------------|
| <b>CHCl<sub>3</sub></b> | 1.48                                 | 80.74                                                       | 134.12                          | 1                                                      | 18.9                                            |
| <b>CH<sub>3</sub>OH</b> | 0.79                                 | 40.50                                                       | 67.27                           | 2                                                      | 29.7                                            |
| <b>PMMA</b>             | 1.18                                 | 84.74                                                       | 140.76                          | 1                                                      | 19.5                                            |

**Table S2.** Flory-Huggins interaction parameters between beads.

|                    | CHCl <sub>3</sub> | CH <sub>3</sub> OH | PMMA |
|--------------------|-------------------|--------------------|------|
| CHCl <sub>3</sub>  | 0                 |                    |      |
| CH <sub>3</sub> OH | 3.870             |                    |      |
| PMMA               | 0.011             | 3.450              | 0    |

**Table S3.** DPD interaction parameters between beads.

|                    | CHCl <sub>3</sub> | CH <sub>3</sub> OH | PMMA  |
|--------------------|-------------------|--------------------|-------|
| CHCl <sub>3</sub>  | 25.00             |                    |       |
| CH <sub>3</sub> OH | 38.53             | 25.00              |       |
| PMMA               | 25.04             | 37.06              | 25.00 |

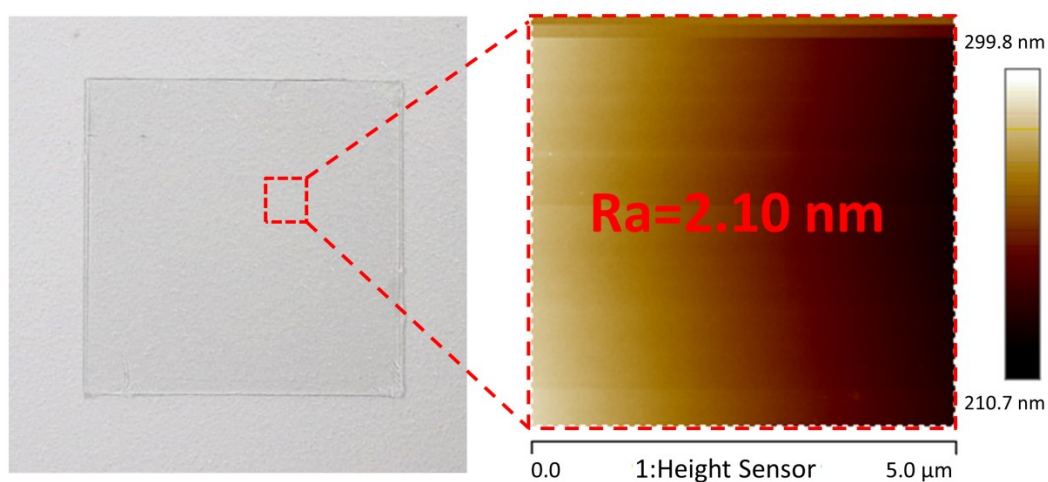

**Figure S2.** The photo of the spin-coating PMMA film and the AFM image of surface roughness.

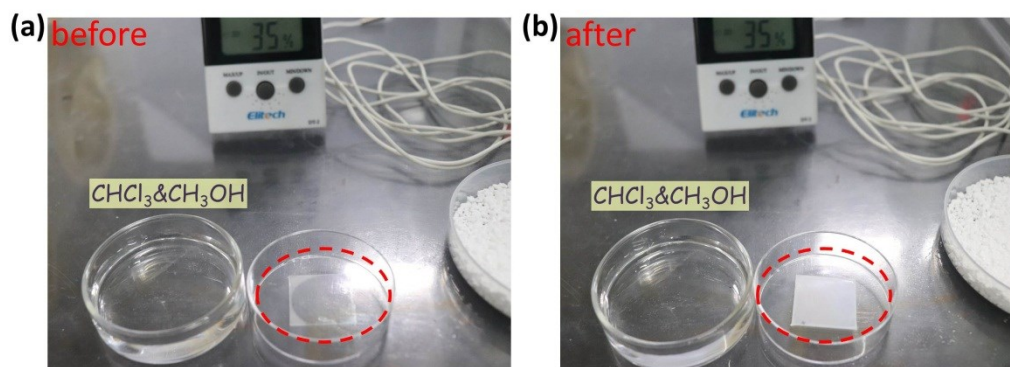

**Figure S3.** Optical pictures of the experimental equipment. The initial state (a) and the final state (b) of the PMMA coating glass after soaking in the  $\text{CHCl}_3/\text{CH}_3\text{OH}$  solution, respectively.

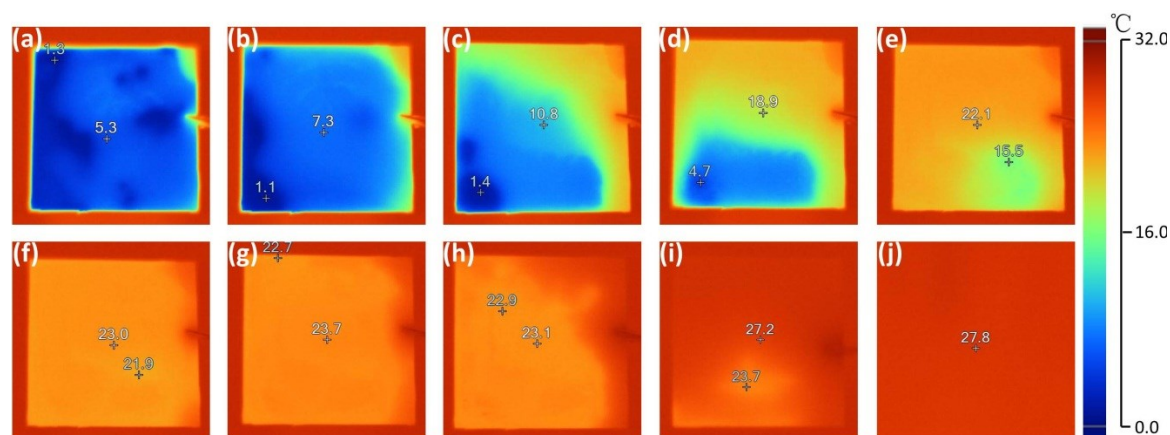

**Figure S4.** The surface temperature of PMMA film during the solvent volatilization. (a-j) IR images after the PMMA film draining out the  $\text{CHCl}_3/\text{CH}_3\text{OH}$  solution from the beginning to the end (recorded by every 15 s).

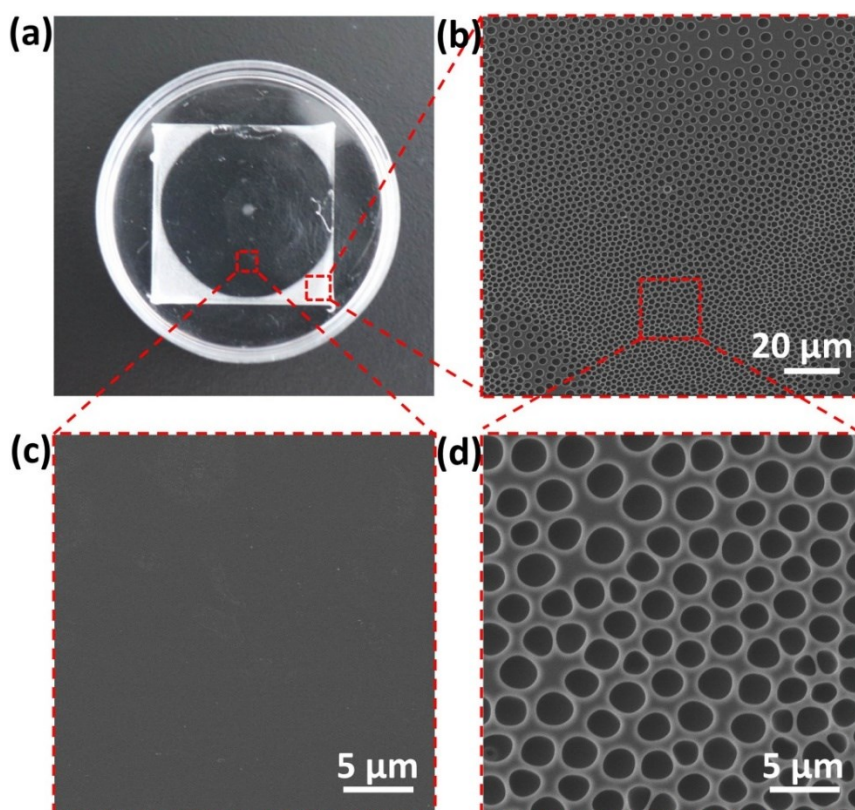

**Figure S5.** The one-step spin-coating film of the ternary system composed by chloroform, methanol and PMMA. (a) The optical photograph of PMMA film. The SEM images (b) and its magnification (d) of the edge of the polymer film. (c) The SEM image of the transparent part in the center of the polymer film.

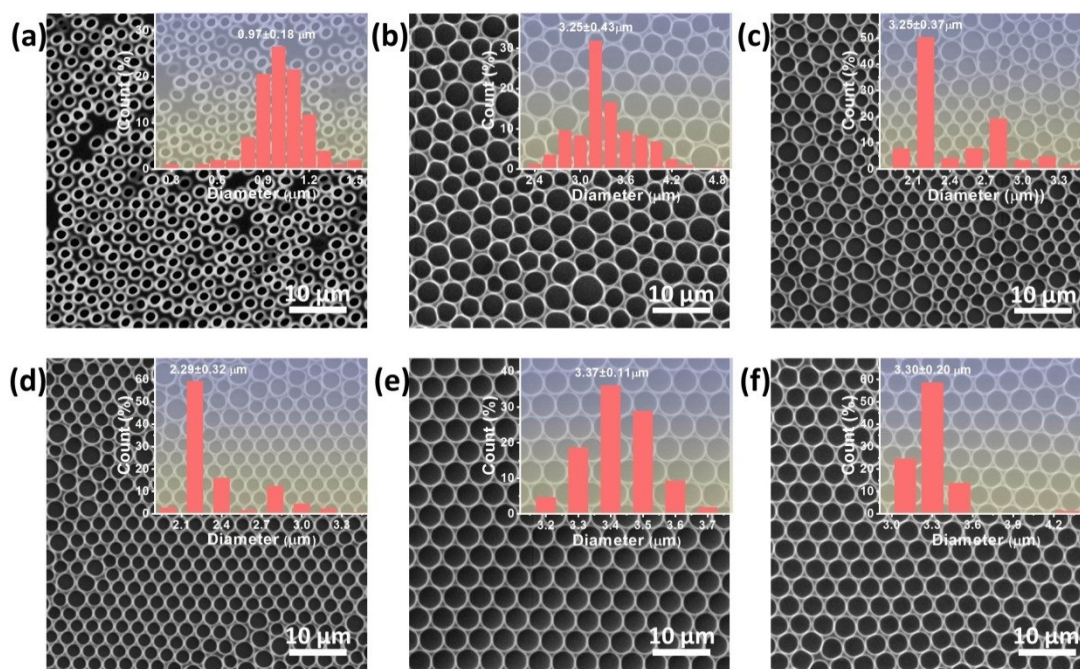

**Figure S6.** SEM images of micro-honeycomb structures at different mixing times of methanol and chloroform. (a-f) The mixing time of 0 h, 2 h, 4 h, 6 h, 8 h and 10 h,

respectively.

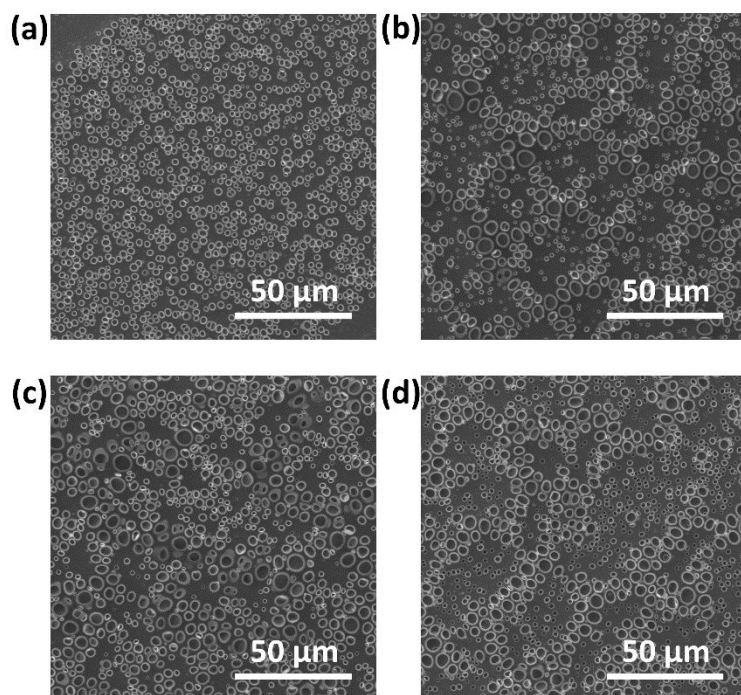

**Figure S7.** SEM images of micro-honeycomb structures only soaking in the chloroform solvent without methanol at different humidity. (a-d) 20%RH, 30%RH, 40%RH and 60%RH, respectively.

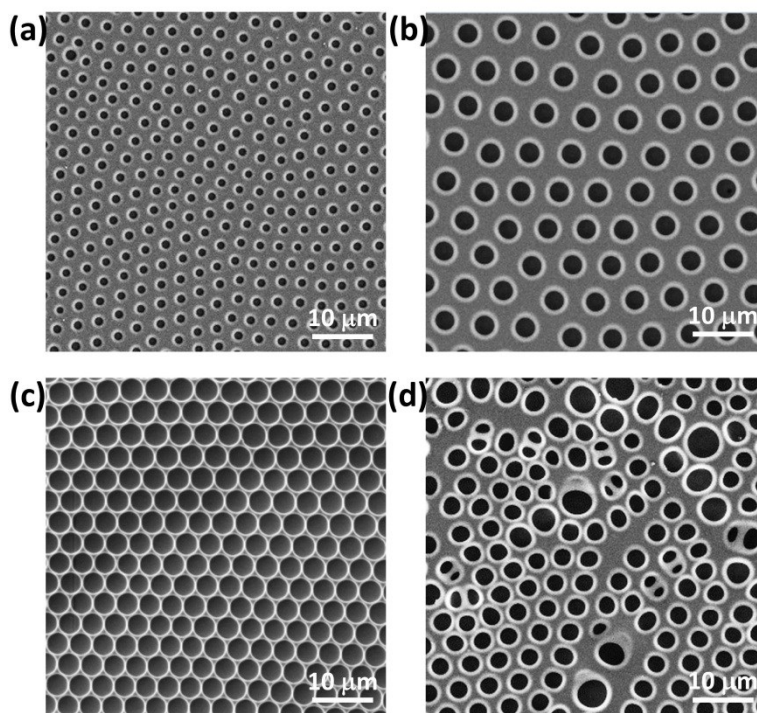

**Figure S8.** SEM images of micro-honeycomb structures with different humidity. (a-d) 20% RH, 30% RH, 40% RH and 60% RH, respectively.

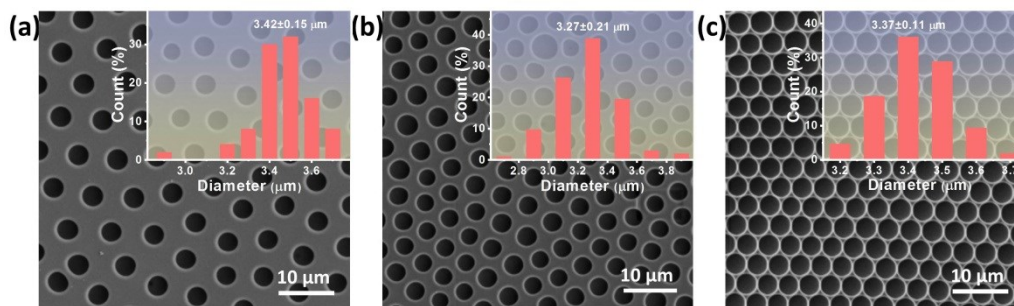

**Figure S9.** SEM images of micro-honeycomb structures on different substrates at the same preparing condition. (a-c) The copper sheet, silicon wafer and glass slice, respectively.

Reference:

1. C. M. Hansen, Hansen solubility parameters: a user's handbook. -- 2nd ed.: CRC Press of Taylor & Francis Group, 2007.
